# Supplementary material for: Valence-engineering modulation of MoS2 clusters for enhancing biocatalytic activity
Source: Royal Society of Chemistry journal article supplement (doi:10.1039/d4nr04527k), 2024-12-24
Supplement: d4nr04527k1.pdf [file d4nr04527k1.pdf]

## Supporting Information

### **Valence-engineered modulation of MoS<sub>2</sub> clusters for enhancing biocatalytic activity**

*Xiaoyan Xue<sup>†a</sup>, Meili Guo<sup>\*a</sup>, Hao Zhang<sup>†b</sup>, Qingshan Liu<sup>b</sup>, Xuyan Li<sup>b</sup>, Xin Sun<sup>b</sup>, Xiaoyu Mu<sup>\*b</sup>, Xiao-Dong Zhang<sup>\*b</sup>*

*<sup>a</sup>Department of Physics, School of Science, Tianjin Chengjian University, Tianjin 300384, China.*

*<sup>b</sup>Tianjin Key Laboratory of Brain Science and Neural Engineering, Academy of Medical Engineering and Translational Medicine, Tianjin University, Tianjin 300072, China. E-mail: xiaodongzhang@tju.edu.cn;*

*\*Correspondence to Xiao-Dong Zhang, E-mail: xiaodongzhang@tju.edu.cn. Meili Guo, E-mail: [meiligu314@163.com](mailto:meiligu314@163.com). Xiaoyu Mu, E-mail: muxiaoyu@tju.edu.cn.*

*† These authors contributed equally to this work*

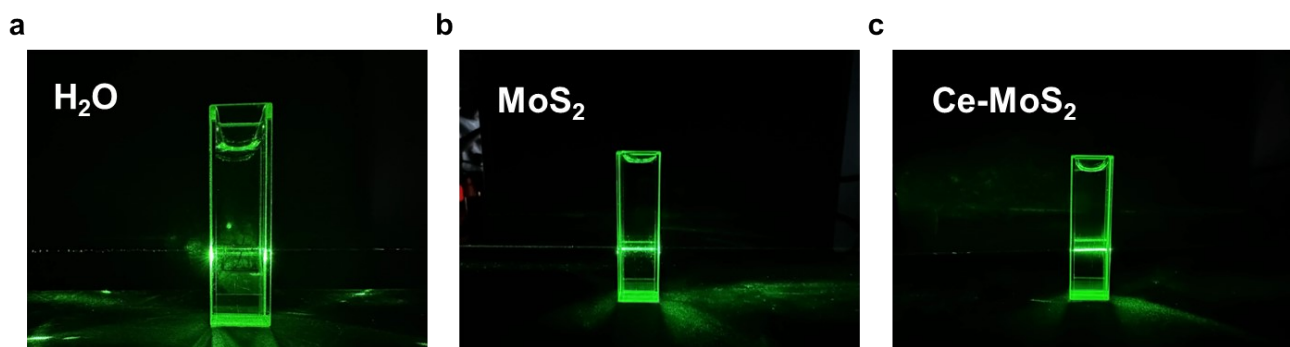

**Fig. S1.** Unique Tyndall effect for (a) water, (b)  $MoS_2$  clusters and (c)  $Ce-MoS_2$  clusters under 532 nm excitation.

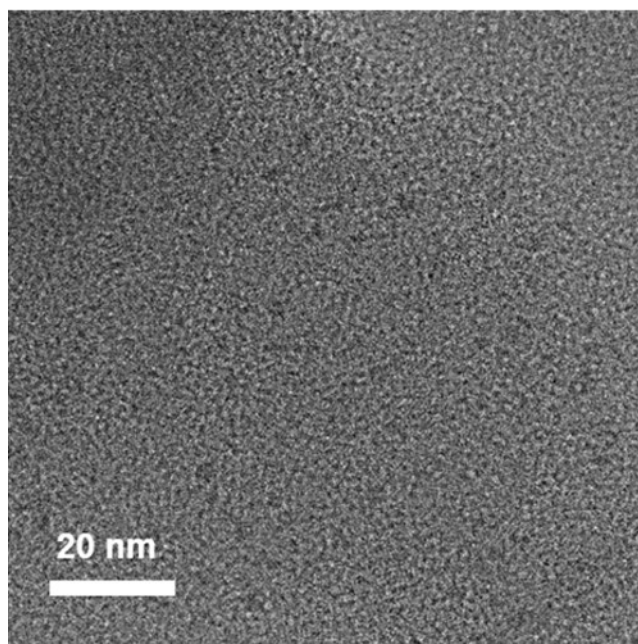

**Fig. S2.** TEM image of  $MoS_2$  clusters. Scale bar: 20 nm.

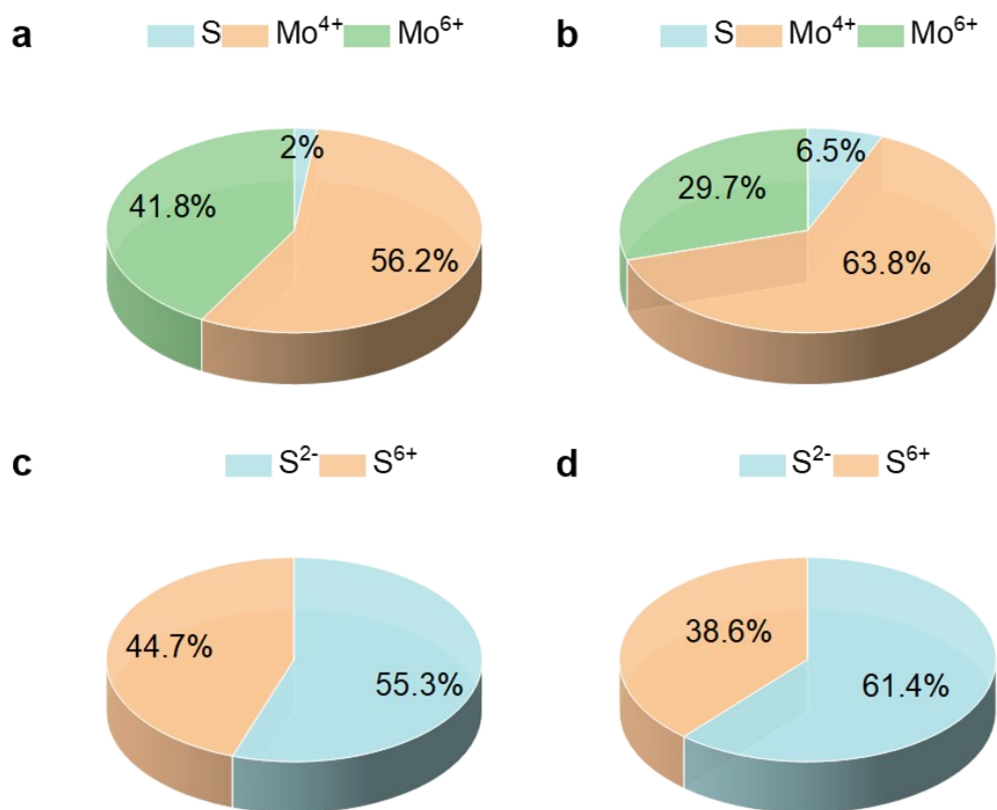

**Fig. S3. Distribution of elemental content in XPS spectra.** Elemental content distribution of Mo 3d in (a) MoS<sub>2</sub> clusters and (b) Ce-MoS<sub>2</sub> clusters. Elemental content distribution of S 2p in (c) MoS<sub>2</sub> clusters and (d) Ce-MoS<sub>2</sub> clusters.

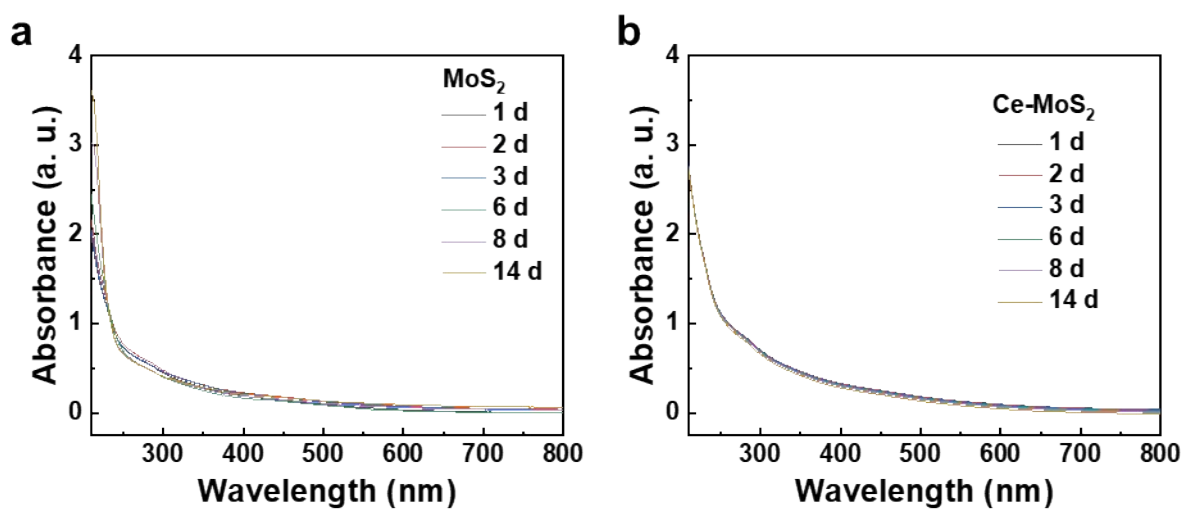

**Fig. S4. UV-vis absorption spectra for 14 consecutive days of (a) MoS<sub>2</sub> clusters and (b) Ce-MoS<sub>2</sub> clusters, indicating high stability.**

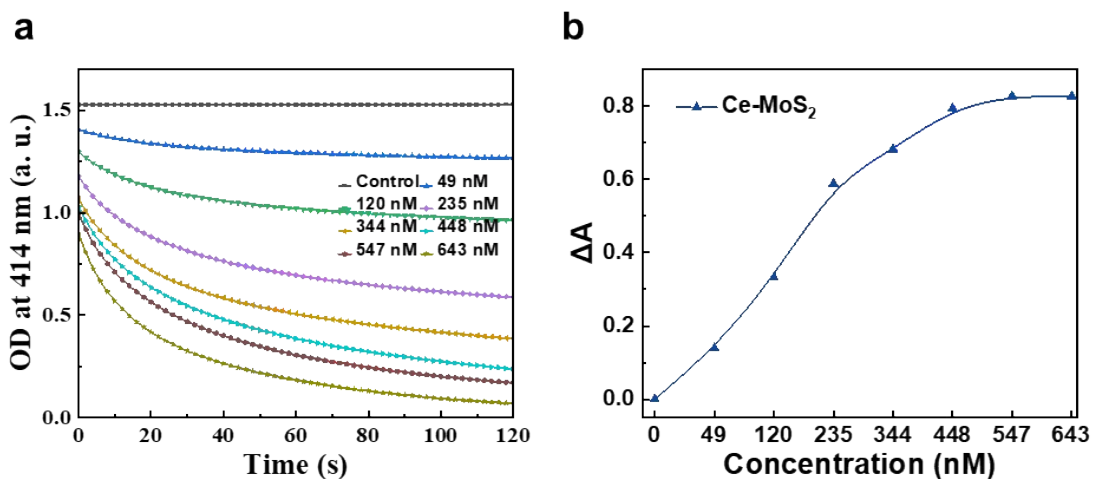

**Fig. S5.** (a) Time-dependent changes in absorbance value at 414 nm with Ce-MoS<sub>2</sub> clusters at different concentrations. (b) Absorbance difference with concentration of Ce-MoS<sub>2</sub> clusters.

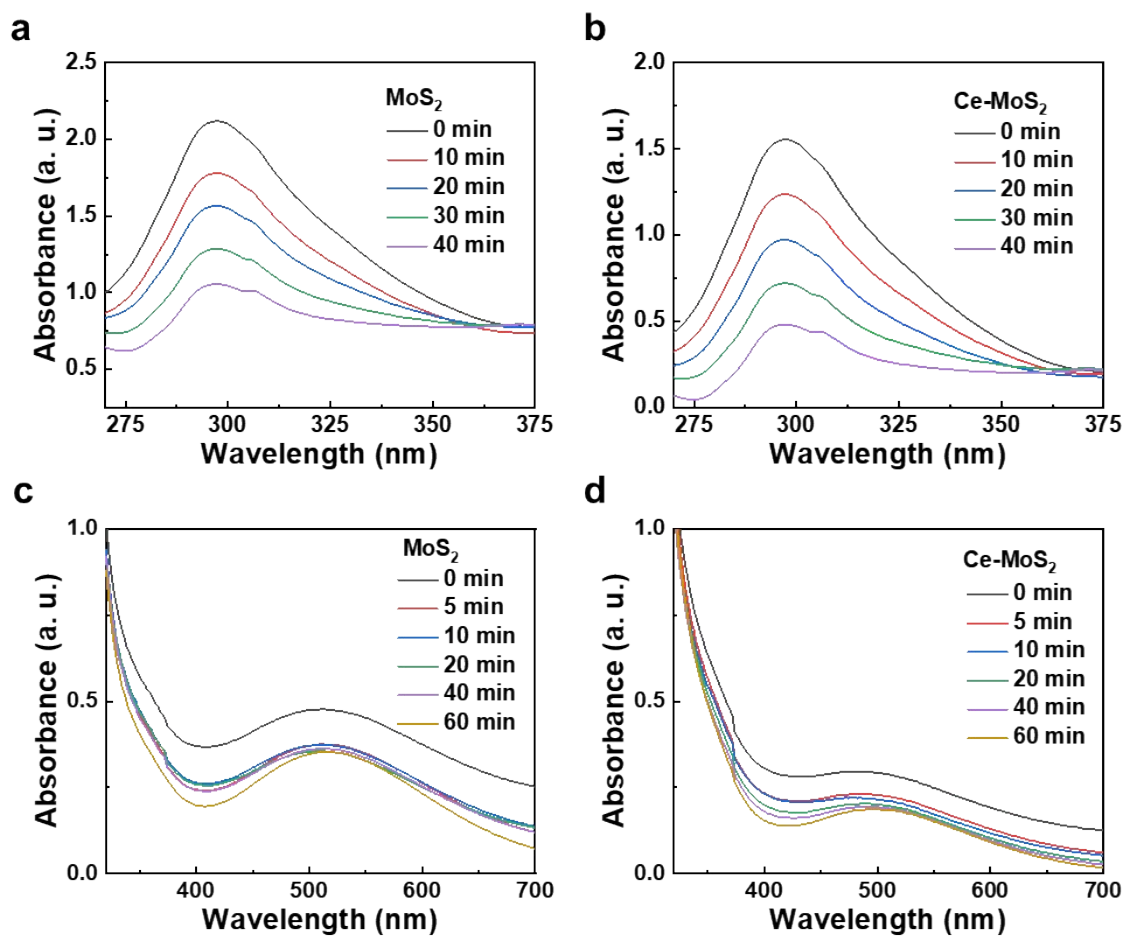

**Fig. S6.** RNS scavenging properties of MoS<sub>2</sub> and Ce-MoS<sub>2</sub> clusters. UV-vis absorption spectra of ONOO<sup>-</sup> eliminated by (a) MoS<sub>2</sub> and (b) Ce-MoS<sub>2</sub> clusters at different times. UV-vis

absorption spectra of DPPH• eliminated by (c) MoS<sub>2</sub> and (d) Ce-MoS<sub>2</sub> clusters at different times.
